# Supplementary material
Source: publisher figshare collection journal article supplement (https://sage.figshare.com/ndownloader/files/14760266)
Supplement: Supplementary file 1 [file 14760266]

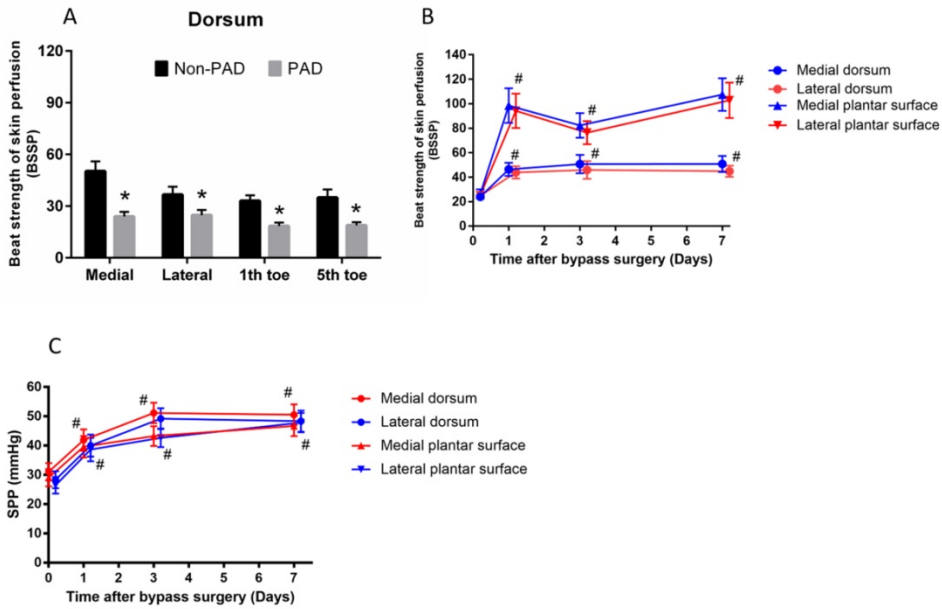

### Supplemental figure legend

The BSSP on the dorsum of the foot is presented for all non-PAD controls (N= 46) and PAD limbs (N= 33). \*P<0.05 between the non-PAD control limbs and PAD limbs (A). Blood flow changes in the feet that were evaluated (N= 33) after surgical revascularization using LSFG (B) and skin perfusion pressure (C). #P<0.05 compared with the preoperative value for each side.
